# Supplementary material for: A branched heterochronic pathway directs juvenile-to-adult transition through two LIN-29 isoforms
Source: eLife. 2020 Mar 30;9:e53387. doi: 10.7554/eLife.53387 (PMC7105380; doi:10.7554/eLife.53387)
Supplement: Figure 1—source data 1. [file elife-53387-fig1-data1.xlsx]

## Sheet: Figure 1-Source data 1_fusion
Stage: late L4
worm line with ajm marker	completely fused	not fused	total number of counted worms
N2 (wild-type)	34	0	34
let-7(n2853)	24	0	24
let-7(xe150)	57	0	57
lin-41(xe8)	34	0	34
