# Supplementary material for: A branched heterochronic pathway directs juvenile-to-adult transition through two LIN-29 isoforms
Source: eLife. 2020 Mar 30;9:e53387. doi: 10.7554/eLife.53387 (PMC7105380; doi:10.7554/eLife.53387)
Supplement: Figure 3—source data 1. [file elife-53387-fig3-data1.xlsx]

## Sheet: Figure 3-Source data 1_fusion
Stage: late L4
	completely fused	unfused junction = uj														total number of counted worms
worm line with ajm marker		1 uj	2 uj	3 uj	4 uj	5 uj	6 uj	7 uj	8 uj	9 uj	10 uj	11 uj	12 uj	13 uj	14 uj
N2 (wild-type)	22	0	0	0	0	0	0	0	0	0	0	0	0	0	0	22
lin-29(xe40)	22	0	0	0	0	0	0	0	0	0	0	0	0	0	0	22
lin-29(xe116)	0	0	2	1	1	5	1	6	3	4	1	2	5	0	0	31
lin-29(xe120)	0	0	0	0	0	0	1	2	1	3	3	11	5	6	0	32
mab-10(xe44)	22	0	0	0	0	0	0	0	0	0	0	0	0	0	0	22
mab-10(xe44) lin-29(xe40)	22	0	0	0	0	0	0	0	0	0	0	0	0	0	0	22
mab-10(xe44) lin-29(xe116)	0	0	0	2	4	3	7	5	1	5	3	2	0	0	0	32
mab-10(xe44) lin-29(xe120)	0	0	0	0	0	2	6	5	5	4	2	5	1	0	0	30
lin-29(xe37)	0	0	0	0	0	0	0	0	1	1	5	4	5	10	5	31
