# Supplementary material for: A branched heterochronic pathway directs juvenile-to-adult transition through two LIN-29 isoforms
Source: eLife. 2020 Mar 30;9:e53387. doi: 10.7554/eLife.53387 (PMC7105380; doi:10.7554/eLife.53387)
Supplement: Figure 3—source data 2. [file elife-53387-fig3-data2.xlsx]

## Sheet: Figure 3-Source data 2_fusion
Stage: young Adult
	completely fused	unfused junction = uj									total number of counted worms
worm line with ajm marker		1 uj	2 uj	3 uj	4 uj	5 uj	6 uj	7 uj	8 uj	>8 uj
N2 (wild-type)	18	0	0	0	0	0	0	0	0	0	18
lin-29(xe40)	36	0	0	0	0	0	0	0	0	0	36
mab-10(xe44)	38	0	0	0	0	0	0	0	0	0	38
mab-10(xe44) lin-29(xe40)	14	0	0	0	0	1	0	0	1	13	29
lin-29(xe37)	0	0	0	0	0	0	0	0	0	40	40
