# Supplementary material for: A branched heterochronic pathway directs juvenile-to-adult transition through two LIN-29 isoforms
Source: eLife. 2020 Mar 30;9:e53387. doi: 10.7554/eLife.53387 (PMC7105380; doi:10.7554/eLife.53387)
Supplement: Figure 3—source data 3. [file elife-53387-fig3-data3.xlsx]

## Sheet: Figure 3-Source data 3_seamNr
Stage: late L4
	number of seam cells																		total number of counted worms
worm line with scm marker	15	16	17	18	19	20	21	22	23	24	25	26	27	28	29	30	31	32
N2 (wild-type)	1	13	8	0	0	0	0	0	0	0	0	0	0	0	0	0	0	0	22
lin-29(xe40)	0	17	5	0	0	0	0	0	0	0	0	0	0	0	0	0	0	0	22
lin-29(xe116)	1	24	6	0	0	0	0	0	0	0	0	0	0	0	0	0	0	0	31
lin-29(xe120)	1	27	4	0	0	0	0	0	0	0	0	0	0	0	0	0	0	0	32
mab-10(xe44)	0	16	5	1	0	0	0	0	0	0	0	0	0	0	0	0	0	0	22
mab-10(xe44) lin-29(xe40)	0	17	5	0	0	0	0	0	0	0	0	0	0	0	0	0	0	0	22
mab-10(xe44) lin-29(xe116)	1	25	5	1	0	0	0	0	0	0	0	0	0	0	0	0	0	0	32
mab-10(xe44) lin-29(xe120)	1	21	6	2	0	0	0	0	0	0	0	0	0	0	0	0	0	0	30
lin-29(xe37)	0	27	4	0	0	0	0	0	0	0	0	0	0	0	0	0	0	0	31
mab-10(xe44) lin-29(xe37)	0	17	3	0	0	0	0	0	0	0	0	0	0	0	0	0	0	0	20
Stage: young adult
	number of seam cells																		total number of counted worms
worm line with scm marker	15	16	17	18	19	20	21	22	23	24	25	26	27	28	29	30	31	32
N2 (wild-type)	1	33	18	3	0	0	0	0	0	0	0	0	0	0	0	0	0	0	55
lin-29(xe40)	1	37	12	3	0	0	0	0	0	0	0	0	0	0	0	0	0	0	53
lin-29(xe116)	0	7	9	8	6	7	11	7	2	2	0	1	0	1	0	0	0	0	61
lin-29(xe120)	0	0	0	0	0	0	0	0	0	0	8	13	12	7	9	3	0	0	52
mab-10(xe44)	1	36	12	4	0	0	0	0	0	0	0	0	0	0	0	0	0	0	53
mab-10(xe44) lin-29(xe40)	0	14	8	3	0	1	1	0	0	0	3	6	8	3	2	2	0	1	52
mab-10(xe44) lin-29(xe116)	0	0	0	1	1	0	0	2	1	4	8	11	12	5	3	1	2	0	51
mab-10(xe44) lin-29(xe120)	0	0	0	0	0	0	0	0	0	1	8	12	11	9	7	3	0	0	51
lin-29(xe37)	0	0	0	0	0	0	0	0	0	0	2	8	7	13	13	3	4	2	52
mab-10(xe44) lin-29(xe37)	0	0	0	0	0	0	0	0	0	0	3	6	12	13	9	3	2	4	52
