# Supplementary material for: A branched heterochronic pathway directs juvenile-to-adult transition through two LIN-29 isoforms
Source: eLife. 2020 Mar 30;9:e53387. doi: 10.7554/eLife.53387 (PMC7105380; doi:10.7554/eLife.53387)
Supplement: Figure 4—source data 1. [file elife-53387-fig4-data1.xlsx]

## Sheet: Figure 4-Source data 1_alae
Stage: young adult
worm line	complete alae	complete weak alae	partial weak alae >= 50%	partial weak alae <50%	alae patches (1-4)	absent alae	number of scored worms
N2 (wild-type)	32	0	0	0	0	0	32
lin-29(xe40)	0	21	12	0	0	0	33
lin-29(xe116)	0	0	0	0	31	2	33
lin-29(xe120)	0	0	0	0	19	14	33
mab-10(xe44)	32	0	0	0	0	0	32
mab-10(xe44) lin-29(xe40)	0	19	15	0	0	0	34
mab-10(xe44) lin-29(xe116)	0	0	0	0	31	2	33
mab-10(xe44) lin-29(xe120)	0	0	0	0	17	16	33
lin-29(xe37)	0	0	0	0	0	32	32
