# Supplementary material for: A branched heterochronic pathway directs juvenile-to-adult transition through two LIN-29 isoforms
Source: eLife. 2020 Mar 30;9:e53387. doi: 10.7554/eLife.53387 (PMC7105380; doi:10.7554/eLife.53387)
Supplement: Figure 5—source data 1. [file elife-53387-fig5-data1.xlsx]

## Sheet: Figure 5-Source data 1_molts
worm line	4 molts	5 molts	6 molts	total number of worms
N2 (wild-type)	336	0	0	336
lin-29(xe40)	96	0	0	96
lin-29(xe116)	112	0	0	112
lin-29(xe120)	94	0	0	94
mab-10(xe44)	105	0	0	105
mab-10(xe44) lin-29(xe40)	50	10	6	66
mab-10(xe44) lin-29(xe116)	125	0	0	125
mab-10(xe44) lin-29(xe120)	28	0	0	28
lin-29(xe37)	0	144	124	268
