# Supplementary material for: A branched heterochronic pathway directs juvenile-to-adult transition through two LIN-29 isoforms
Source: eLife. 2020 Mar 30;9:e53387. doi: 10.7554/eLife.53387 (PMC7105380; doi:10.7554/eLife.53387)
Supplement: Figure 6—figure supplement 2—source data 1. [file elife-53387-fig6-figsupp2-data1.xlsx]

## Sheet: Figure 6-sF2_Source data 1
Stage: late L4
worm line with ajm marker	completely fused	not fused	1 uj	total number of counted worms
N2 (wild-type)	68	0	1	69
lin-29(xe200)	64	0	0	64
mab-10(xe44) lin-29(xe200)	48	0	2	50
lin-29(xe37)	0	28	0	28
