# Supplementary material for: A branched heterochronic pathway directs juvenile-to-adult transition through two LIN-29 isoforms
Source: eLife. 2020 Mar 30;9:e53387. doi: 10.7554/eLife.53387 (PMC7105380; doi:10.7554/eLife.53387)
Supplement: Figure 6—source data 2. [file elife-53387-fig6-data2.xlsx]

## Sheet: Figure 6-Source data 2_alae
Stage: young adult
worm line	complete alae	complete weak alae	partial weak alae >= 50%	partial weak alae <50%	alae patches (1-4)	absent alae	number of scored worms
N2 (wild-type)	52	0	0	0	0	0	52
Lin-29(xe200)	39	0	0	0	0	0	39
mab-10(xe44)in-29(xe200)	31	0	0	0	0	0	31
Lin-29(xe37)	0	0	0	0	0	28	28
