# Supplementary material for: A branched heterochronic pathway directs juvenile-to-adult transition through two LIN-29 isoforms
Source: eLife. 2020 Mar 30;9:e53387. doi: 10.7554/eLife.53387 (PMC7105380; doi:10.7554/eLife.53387)
Supplement: Figure 6—source data 3. [file elife-53387-fig6-data3.xlsx]

## Sheet: Figure 6-Source data 3_molts
worm line	4 molts	5 molts	6 molts	total number of worms
N2 (wild-type)	116	0	0	116
lin-29(xe200)	351	0	0	351
mab-10(xe44) lin-29(xe200)	305	0	0	305
lin-29(xe37)	0	37	42	79
