# Supplementary material for: A branched heterochronic pathway directs juvenile-to-adult transition through two LIN-29 isoforms
Source: eLife journal article supplement (doi:10.7554/elife.53387), 2020-03-30
Supplement: supp1 [file elife-53387-supp1-v1.pdf]

**Supplementary file 1A: Plasmid used in this study**

| Short name                 | Plasmid backbone                                                   | Insert                                                                                                 | Cloning technique                                                                                                                                                                                                              | Primers <sup>a</sup> or gBlocks <sup>b</sup> |                                                                  |
|----------------------------|--------------------------------------------------------------------|--------------------------------------------------------------------------------------------------------|--------------------------------------------------------------------------------------------------------------------------------------------------------------------------------------------------------------------------------|----------------------------------------------|------------------------------------------------------------------|
| pIK155                     | published in (Katic et al., 2015)                                  |                                                                                                        |                                                                                                                                                                                                                                |                                              |                                                                  |
| pIK198                     | published in (Katic et al., 2015)                                  |                                                                                                        |                                                                                                                                                                                                                                |                                              |                                                                  |
| pCFJ90                     | published in (Frøkjær-Jensen et al., 2008)                         |                                                                                                        |                                                                                                                                                                                                                                |                                              |                                                                  |
| pCFJ104                    | published in (Frøkjær-Jensen et al., 2008)                         |                                                                                                        |                                                                                                                                                                                                                                |                                              |                                                                  |
| pFA27                      | published in (Aeschmann et al., 2019)                              |                                                                                                        |                                                                                                                                                                                                                                |                                              |                                                                  |
| pFA224                     | pENTR L4-R1                                                        | <i>col-10</i> promoter                                                                                 | gift from Matyas Ecsedi. The <i>col-10</i> promoter starts is 1320 bp long and starts with the following sequence: 5'-CCTCGGGTGGTCATCATCTCAAATCCAATCTTCTTTTCATTTTCAATCTCTAACAAATTTCAAATTACTAGAACCCACAAACCAATGTTTCGATA ... - 3' |                                              |                                                                  |
| pFA198                     | pENTR L1-L2                                                        | 3xFLAG tag followed by BamHI restriction site (can be used for Gibson assembly instead of BP reaction) | BP reaction <sup>c</sup>                                                                                                                                                                                                       | fwd primer                                   | ggggacaagttgtacaaaaaagcaggctATGGATTATAAAGACGATGACGATAAGCGTGA     |
|                            |                                                                    |                                                                                                        |                                                                                                                                                                                                                                | rev primer                                   | ggggaccactttgtacaagaaagctgggtGGATCCTCTCTTGTTCATCGTCATCCTTGTAAATC |
| pFA199                     | pENTR L1-L2                                                        | 3xFLAG:: <i>lin-29a</i> (ORF and 3'UTR; including introns except for intron 4)                         | Gibson assembly <sup>d</sup>                                                                                                                                                                                                   | fwd(1)                                       | acaaggatgacgatgacaagagaATGGATCAAAGTCTTAGATTCGGCA                 |
|                            |                                                                    |                                                                                                        |                                                                                                                                                                                                                                | rev(1)                                       | gctttgttcgaaCTGTGGATATCTTCAAATTTGTGA                             |
|                            |                                                                    |                                                                                                        |                                                                                                                                                                                                                                | fwd(2)                                       | tggaagatccacagTTCGAACAAAAGCCGGACGT                               |
|                            |                                                                    |                                                                                                        |                                                                                                                                                                                                                                | rev(2)                                       | tgcccactttgtacaagaaagctgggtCCACTGTGCATGAAAAAGCTGGT               |
| pFA206                     | pENTR L1-L2                                                        | 3xFLAG:: <i>lin-29b</i> (ORF and 3'UTR, including introns)                                             | Gibson assembly <sup>e</sup>                                                                                                                                                                                                   | fwd primer                                   | acaaggatgacgatgacaagagaATGCAGATGCGGGAAGCAAAAC                    |
|                            |                                                                    |                                                                                                        |                                                                                                                                                                                                                                | rev primer                                   | tgcccactttgtacaagaaagctgggtCCACTGTGCATGAAAAAGCTGGT               |
| pFA207                     | pENTR L1-L2                                                        | 3xFLAG:: <i>mab-10</i> (ORF and 3'UTR, including introns)                                              | Gibson assembly <sup>e</sup>                                                                                                                                                                                                   | fwd primer                                   | acaaggatgacgatgacaagagaATGCATCATCGTCGTCGTC                       |
|                            |                                                                    |                                                                                                        |                                                                                                                                                                                                                                | rev primer                                   | tgcccactttgtacaagaaagctgggtACTATTGTTACGGGAATCATGTCT              |
| pFA218                     | published in (Aeschmann et al., 2019)                              |                                                                                                        |                                                                                                                                                                                                                                |                                              |                                                                  |
| pFA219                     | pENTR L1-L2                                                        | FLAG-HA-degron:: <i>lin-29a</i> (ORF and 3'UTR; including introns except for intron 4)                 | Gibson assembly <sup>f</sup>                                                                                                                                                                                                   | fwd primer                                   | aggcggcggcgttcgtgaagATGGATCAAAGTCTTAGATTCGGCA                    |
|                            |                                                                    |                                                                                                        |                                                                                                                                                                                                                                | rev primer                                   | tgcccactttgtacaagaaagctgggtCCACTGTGCATGAAAAAGCTGGT               |
| pFA220                     | pENTR L1-L2                                                        | FLAG-HA-degron:: <i>lin-29b</i> (ORF and 3'UTR, including introns)                                     | Gibson assembly <sup>f</sup>                                                                                                                                                                                                   | fwd primer                                   | aggcggcggcgttcgtgaagATGCAGATGCGGGAAGCAAAAC                       |
|                            |                                                                    |                                                                                                        |                                                                                                                                                                                                                                | rev primer                                   | tgcccactttgtacaagaaagctgggtCCACTGTGCATGAAAAAGCTGGT               |
| pFA221                     | pENTR L1-L2                                                        | FLAG-HA-degron:: <i>mab-10</i> (ORF and 3'UTR, including introns)                                      | Gibson assembly <sup>f</sup>                                                                                                                                                                                                   | fwd primer                                   | aggcggcggcgttcgtgaagATGCATCATCGTCGTCGTC                          |
|                            |                                                                    |                                                                                                        |                                                                                                                                                                                                                                | rev primer                                   | tgcccactttgtacaagaaagctgggtACTATTGTTACGGGAATCATGTCT              |
| pENTR_R2-L3 operon-GFP-H2b | published in (Ecsedi et al., 2015) based on (Merritt et al., 2008) |                                                                                                        |                                                                                                                                                                                                                                |                                              |                                                                  |
| pFA238                     | pCFJ150                                                            | pFA224, pFA219, pENTR_R2-L3 operon-GFP-H2b                                                             | LR reaction                                                                                                                                                                                                                    |                                              |                                                                  |
| pFA239                     | pCFJ150                                                            | pFA224, pFA220, pENTR_R2-L3 operon-GFP-H2b                                                             | LR reaction                                                                                                                                                                                                                    |                                              |                                                                  |
| pFA240                     | pCFJ150                                                            | pFA224, pFA221, pENTR_R2-L3 operon-GFP-H2b                                                             | LR reaction                                                                                                                                                                                                                    |                                              |                                                                  |

<sup>a</sup>Overhangs are in lowercase, the part annealing to the template in uppercase. If not stated otherwise, the PCR products were amplified from *C. elegans* genomic DNA.

<sup>b</sup>Overhangs for Gibson assembly reactions are in lowercase.

<sup>c</sup>PCR product was amplified from pFA27.

<sup>d</sup>Assembly with BamHI-digested plasmid pFA198 and two PCR products.

<sup>e</sup>Assembly with BamHI-digested plasmid pFA198 and one PCR product.

<sup>f</sup>Assembly with BamHI-digested plasmid pFA218 and one PCR product.

**Supplementary file 1B: oligonucleotides and sgRNAs used in this study**

| Identifier | Sequence                                                                                                                                                                                                                     | Source                    | Description                                                                |
|------------|------------------------------------------------------------------------------------------------------------------------------------------------------------------------------------------------------------------------------|---------------------------|----------------------------------------------------------------------------|
| CA1-2      | ctaagcctaagtctatgcctaagcccaagcttgatctcaca<br>atthaagctttcaaactagtgctaattaaag<br>ggaatacggtttcagaattaaggagacacctagatcaatt<br>gagctctaaagatccactatattcaatgtac<br>ttacagttcgaacaaaagccggacgtgggggtgcttcag<br>caacagatgcagatgcgg | This study                | HR oligo for generation <i>lin-29(xe61 xe114)</i> and <i>lin-29(xe116)</i> |
| FA419      | gaacggaatgatccgaaacctagatcaattgagctctaa<br>agatccactatattcaatgtacttacagttc<br>gaacaaaagccagatgtcgggggtgcttcagcaacagat<br>gcagatgcgggaagcaaaccttaca<br>gtgcacgcagtggtcaaggtatgtgt                                             | This study                | HR oligo for generation <i>lin-29(xe61 xe121)</i> and <i>lin-29(xe120)</i> |
| FA434      | cctttcagcttcgagaggatcaagccaacttctcaacgca<br>atgttttcacaattggaagataccacag<br>gtttgataggggaacacattcaaacgaggggta                                                                                                                | This study                | HR oligo for generation <i>lin-29(xe61 xe133)</i> and <i>lin-29(xe200)</i> |
| 3-AC15-16  | acagaattaaggagacaagg                                                                                                                                                                                                         | This study                | sgRNA for generation <i>lin-29(xe61 xe114)</i> and <i>lin-29(xe116)</i>    |
| 2-AC2-3    | agctcaattgatctaggttt                                                                                                                                                                                                         | This study                | sgRNA for generation <i>lin-29(xe61 xe114)</i> and <i>lin-29(xe116)</i>    |
| L29_ATG1   | gttcgaacaaaagccggacg                                                                                                                                                                                                         | This study                | sgRNA for generation <i>lin-29(xe61 xe121)</i> and <i>lin-29(xe120)</i>    |
| L29_ATG3   | agctgaagcaccaccacgctc                                                                                                                                                                                                        | This study                | sgRNA for generation <i>lin-29(xe61 xe121)</i> and <i>lin-29(xe120)</i>    |
| L29_031    | gctggaaccaccactggctc                                                                                                                                                                                                         | This study                | sgRNA for generation <i>lin-29(xe61 xe133)</i> and <i>lin-29(xe200)</i>    |
| L29_041    | gtggcaggagagaattctga                                                                                                                                                                                                         | This study                | sgRNA for generation <i>lin-29(xe61 xe133)</i> and <i>lin-29(xe200)</i>    |
| L29_if1    | agccaacttctcaacgcaa                                                                                                                                                                                                          | This study                | sgRNA for generation <i>lin-29(xe61 xe133)</i> and <i>lin-29(xe200)</i>    |
| L29_if3    | gtgaaaacatatgatgtggc                                                                                                                                                                                                         | This study                | sgRNA for generation <i>lin-29(xe61 xe133)</i> and <i>lin-29(xe200)</i>    |
| lin-29_F4  | ccagcacatcattcgatcact                                                                                                                                                                                                        | (Aeschimann et al., 2017) | qPCR primer for <i>lin-29a</i> specific detection (exon3-exon4 junction)   |
| lin-29_R4  | gaagttcagtagatccgcttga                                                                                                                                                                                                       | (Aeschimann et al., 2017) | qPCR primer for <i>lin-29a</i> specific detection (exon3-exon4 junction)   |

|           |                        |                           |                                                                        |
|-----------|------------------------|---------------------------|------------------------------------------------------------------------|
| lin-29_F5 | acccaagtttgagttcgaaca  | (Aeschimann et al., 2017) | qPCR primer for <i>lin-29b</i> specific detection (SL1-exon5 junction) |
| lin-29_R5 | gatgagttggcaaatgccttga | (Aeschimann et al., 2017) | qPCR primer for <i>lin-29b</i> specific detection (SL1-exon5 junction) |
| JKq17     | gtcggagaccacgcatcaa    | This study                | qPCR primer for <i>act-1</i> specific detection (exon1)                |
| JKq18     | agggtaaggatacctctcttga | This study                | qPCR primer for <i>act-1</i> specific detection (exon1-exon3 junction) |
